# Supplementary material
Source: ML conference proceedings conference paper supplement (https://proceedings.neurips.cc/paper_files/paper/2018/hash/1c6a0198177bfcc9bd93f6aab94aad3c-Abstract.html)
Supplement: Supplementary file [file 1c6a0198177bfcc9bd93f6aab94aad3c-Supplemental.zip]

## A Negative association properties of ESR measures

**Proposition 1.** There exist ESR measures that are not SR.

*Proof.* Recall [11, Thm. 4.1] that a real bivariate affine polynomial  $p(x, y)$  is stable if and only if

$$\partial_x p \partial_y p - p \partial_{xy} p \geq 0.$$

For an E-DPP with a kernel  $L \in \mathbb{R}^{2 \times 2}$ , this is exactly  $l_{11}^p l_{22}^p \geq \det(L)^p$ , which is clearly true for all  $p \geq 0$  as  $L$  must be positive semi-definite.

However, stability does not hold in general. To obtain a counterexample, consider the generating polynomial  $p(x, y, z)$  for an E-DPP of dimension 3 (writing  $d = \det(L)$  as a shorthand):

$$p(x, y, z) := d^p + l_{11}^p yz + l_{22}^p xz + l_{33}^p xy + \det(L[1, 2])^p z + \det(L[1, 3])^p y + \det(L[2, 3])^p x + xyz.$$

If  $p(x, y, z)$  is SR,  $p$  must be stable through conditioning [11, Theorem 4.1]; hence,  $p(x, y, 1)$  must also be stable. Writing  $d_{ij} = \det(L[i, j])$ , this requires that

$$p(x, y, 1) = d^p + d_{12}^p + (d_{22}^p + d_{23}^p)x + (d_{11}^p + d_{13}^p)y + (d_{33}^p + 1)xy$$

be stable. Since  $p(x, y, 1)$  is a real bivariate affine polynomial, we must then have

$$(d_{22}^p + d_{23}^p)(d_{11}^p + d_{13}^p) \geq (d^p + d_{12}^p)(d_{33}^p + 1).$$

Finally, one can verify that this last inequality is easily violated for several choices of (non-diagonal) positive semi-definite matrices.  $\square$

**Theorem 1.** There exists  $\epsilon > 0$  such that for any  $p \in [1 - \epsilon, 1 + \epsilon]$  and  $n \in \mathbb{N}$ , the set  $\{L \in \mathbb{R}^{n \times n} : \text{E-DPP}(L, p) \text{ is SR}\}$  is strictly greater than the set of block-diagonal matrices with  $2 \times 2$  blocks.

*Proof.* We write  $d_S^i = \det(L[S \cup \{i\}])^p$  and when possible  $d_{ijk} = \det(L[\{i, j, k\}])^p$ .

Let  $L \succeq 0 \in \mathbb{R}^{n \times n}$ . The associated E-DPP is SR if and only if  $P_{ij}(z) \geq 0$  where  $P_{ij}(z)$  is defined for any  $1 \leq i \neq j \leq n$  as

$$\begin{aligned} P_r(z) &= \frac{\partial f}{\partial z_i}(z) \frac{\partial f}{\partial z_j}(z) - f(z) \frac{\partial^2 f}{\partial z_i \partial z_j}(z) \\ &= \left( \sum_{S \in \mathcal{Y}'} d_S^i z^S \right) \left( \sum_{S \in \mathcal{Y}'} d_S^j z^S \right) - \left( \sum_{S \in \mathcal{Y}'} d_S^{ij} z^S \right) \left( \sum_{S \in \mathcal{Y}'} d_S z^S \right). \end{aligned}$$

where we write  $\mathcal{Y}' = \{S \in [n], i \notin S, j \notin S\}$  and  $z = (z_1, \dots, z_n)$  where components  $z_i$  and  $z_j$  are removed. Now, choose  $k \in [n] \setminus \{i, j\}$ , and write  $\tilde{z}$  the vector  $z$  without component  $z_k$ . Write also  $\mathcal{Y}'_k = \{S \in \mathcal{Y}', k \notin S\}$ . Then,

$$\begin{aligned} P_{ij}(z) &= \left( \sum_{k \notin S} d_S^i \tilde{z}^S + z_k \sum_{k \in S} d_S^i \tilde{z}^S \right) \left( \sum_{k \notin S} d_S^j \tilde{z}^S + z_k \sum_{k \in S} d_S^j \tilde{z}^S \right) \\ &\quad - \left( \sum_{k \notin S} d_S^{ij} \tilde{z}^S + z_k \sum_{k \in S} d_S^{ij} \tilde{z}^S \right) \left( \sum_{k \notin S} d_S \tilde{z}^S + z_k \sum_{k \in S} d_S \tilde{z}^S \right) \\ &= \left( \sum_{S \in \mathcal{Y}'_k} d_S^{ik} \tilde{z}^S \sum_{S \in \mathcal{Y}'_k} d_S^{jk} \tilde{z}^S - \sum_{S \in \mathcal{Y}'_k} d_S^{ijk} \tilde{z}^S \sum_{S \in \mathcal{Y}'_k} d_S^k \tilde{z}^S \right) z_k^2 \\ &\quad + \left( \sum_{S \in \mathcal{Y}'_k} d_S^{ik} \tilde{z}^S \sum_{S \in \mathcal{Y}'_k} d_S^j \tilde{z}^S + \sum_{S \in \mathcal{Y}'_k} d_S^i \tilde{z}^S \sum_{S \in \mathcal{Y}'_k} d_S^{jk} \tilde{z}^S \right. \\ &\quad \left. - \sum_{S \in \mathcal{Y}'_k} d_S^{ijk} \tilde{z}^S \sum_{S \in \mathcal{Y}'_k} d_S \tilde{z}^S - \sum_{S \in \mathcal{Y}'_k} d_S^{ij} \tilde{z}^S \sum_{S \in \mathcal{Y}'_k} d_S^k \tilde{z}^S \right) z_k \\ &\quad + \left( \sum_{S \in \mathcal{Y}'_k} d_S^i \tilde{z}^S \sum_{S \in \mathcal{Y}'_k} d_S^j \tilde{z}^S - \sum_{S \in \mathcal{Y}'_k} d_S^{ij} \tilde{z}^S \sum_{S \in \mathcal{Y}'_k} d_S \tilde{z}^S \right) \\ &= Az_k^2 + Bz_k + C \end{aligned}$$

Hence,  $L$  yields a SR E-DPP measure if and only if the following inequalities hold for all  $i, j, k$ :

$$(B/2)^2 \leq AC; \quad A \geq 0; \quad C \geq 0. \quad (\text{A.1})$$

When  $n = 3$ , Eq. (A.1) reduces to the following arithmetic-geometric inequality, as  $\mathcal{Y}'_k = \{\emptyset\}$ :

$$\left( \frac{d_i d_{jk} + d_j d_{ik} - d_{ij} d_k - d_{ijk}}{2} \right)^2 \leq (d_i d_j - d_{ij})(d_{jk} d_{ik} - d_k d_{ijk}) \quad (\text{A.2})$$

One can easily obtain 3 positive semi-definite matrices  $L$  which verify Eq. (A.2) strictly for  $p = 1$ ; in particular, by continuity, there exists  $\epsilon > 0$  such that the E-DPP generated by the kernel  $L$  and power  $p \in [1 - \epsilon, 1 + \epsilon]$  will still verify Eq. (A.2).

Then, as a block-diagonal matrix such that each diagonal block yields SR E-DPPs also yields a SR E-DPP, we can thus generate block-diagonal matrices of any size  $n$  such that the blocks are either  $L$  or  $2 \times 2$  matrices, which all yield SR E-DPPs for  $p \in [1 - \epsilon, 1 + \epsilon]$ .  $\square$

## B $r$ -closeness

**Proposition 2.** Let  $\mu$  be an SR measure over  $2^{[n]}$ , and define  $\nu$  to be the ESR measure such that  $\mu(S) = \alpha \mu(S)^p$  for a given  $\alpha \in \mathbb{R}$ . Then

$$r(\mu, \nu) \leq \max_{S \in \text{supp}(\nu)} \left[ \mu(S)^{-|p-1|} \right] < \infty.$$

*Proof.* Let  $\mu, \nu$  be as in the proposition statement, and consider  $S \in \text{supp}(\nu)$ :  $\nu(S) > 0$ . Recall that  $\sum_T \nu(T) = 1$ .

$$\frac{\nu(S)}{\mu(S)} = \frac{\mu(S)^p}{\mu(S) \sum_T \mu(T)^p}$$

If  $p \leq 1$ , we have  $\sum_T \mu(T)^p \geq 1$  and  $\mu(S)^p \geq \mu(S)$ , and so

$$(\min_S \mu(S))^{p-1} \leq \frac{\sum_T \mu(T)}{\sum_T \mu(T)^p} = \frac{1}{\sum_T \mu(T)^p} \leq \frac{\mu(S)^p}{\mu(S) \sum_T \mu(T)^p} \leq \mu(S)^{p-1} \leq \frac{1}{\min_S \mu(S)^{1-p}}$$

where the left inequality is obtained by noticing that  $\frac{a+b}{c+d} \geq \min\left(\frac{a}{c}, \frac{b}{d}\right)$ .

Similarly, for  $p \geq 1$ , we have  $\sum_T \mu(T)^p \leq 1$  and  $\mu(T)^p \leq \mu(T)$ , and so

$$\min_S \mu(S)^{p-1} \leq \frac{\mu(S)^p}{\mu(S)} \leq \frac{\mu(S)^p}{\mu(S) \sum_T \mu(T)^p} \leq \frac{\sum_T \mu(T)}{\sum_T \mu(T)^p} \leq \max \mu(S)^{1-p} = \frac{1}{\min \mu(S)^{p-1}}.$$

$\square$

## C Bounds on mixing times

**Theorem 2.** Let  $\mu, \nu$  be measures over  $2^{[n]}$  such that  $\mu$  is SR and  $\nu$  is ESR. Sampling from  $\nu$  via Alg. 1 with  $\mu$  as a proposal distribution has a mixing time  $\tau(\epsilon)$  such that

$$\tau_S(\epsilon) \leq 2r(\mu, \nu^p) \log \frac{1}{\epsilon}.$$

*Proof.* Alg. 1 has a state-independent proposal distribution  $\mu$ , and hence its mixing time is governed by a ratio of probabilities: Cai [14] showed that, after  $t$  iterations,

$$\max_{S, T} d_{\text{TV}}(\nu_{(t)}(\cdot | S), \nu_{(t)}(\cdot | T)) = \left( 1 - \frac{1}{\max_U \nu(U) / \mu(U)} \right)^t$$

where  $\nu_{(t)}(U | S)$  is the probability of being in state  $U$  after  $t$  iterations when starting from set  $S$ , and  $d_{\text{TV}}$  is the total variation distance.

Hence, following [14, Cor.1], we obtain  $\tau_S(\epsilon) \leq 2 \max_U \frac{\nu(U)}{\mu(U)} \log \frac{1}{\epsilon} \leq 2r(\mu, \nu^p) \log \frac{1}{\epsilon}$ .  $\square$

**Theorem 3.** Let  $\nu$  be a  $k$ -homogeneous ESR measure over  $2^{[n]}$ . The mixing time for Alg. 2 with initialization  $S$  is bounded in expectation by

$$\tau_S(\epsilon) \leq \inf_{\mu \in \text{SR}} 2nk r(\mu, \nu)^2 \log \frac{1}{\epsilon \nu(S)}$$

*Proof.* This bound is based on a comparison method [17], and relates the mixing time to the spectral gap. Let  $1 = \mu_1 \geq \mu_2 \geq \dots \geq -1$  be the eigenvalues of the state transition matrix of the chain. The *spectral gap* is  $\gamma = 1 - \max\{|\mu|; \mu \text{ is an eigenvalue and } \mu \neq 1\}$ .  $\gamma$  directly translates into a bound on the mixing time [18]:

$$\tau_S(\gamma) \leq \frac{1}{\gamma} \log \left( \frac{1}{\epsilon \nu(S)} \right).$$

The comparison method yields a bound on  $\gamma$  if we know a bound on  $\tilde{\gamma}$  for a related chain with stationary distribution  $\mu$ . Specifying [17, Thm 2.1] to this case yields  $\gamma \geq \tilde{\gamma} \alpha_1 / \alpha_2$ , where

$$\begin{aligned} \alpha_1 &= \min_S \frac{\mu(S)}{\nu(S)} \geq \frac{1}{r(p)} \\ \alpha_2 &= \max_{T, U} \frac{\mu(T)}{\nu(T)} \frac{\min\{1, \mu(U)/\mu(T)\}}{\min\{1, \nu(U)/\nu(T)\}} \leq \max_T \frac{\mu(T)}{\nu(T)} \leq r(\mu, \nu) \end{aligned}$$

Anari et al. [5] show that  $\tilde{\gamma} \geq \frac{1}{2nk}$ . Hence, we obtain  $\tau_S(\gamma) \leq 2nk \cdot r(\mu, \nu)^2 \cdot \log \frac{1}{\epsilon \nu(S)}$ .  $\square$

## D Bounds for E-DPPs with $L^p$ -kernel proposal

We require the following power-mean inequality:

**Theorem 8** (Specht [45]). Let  $x_i > 0$  and  $w_i \geq 0$  for  $1 \leq i \leq N$  such that  $\sum_i w_i = 1$ . Let  $p < q \in \mathbb{R}$  such that  $pq \neq 0$ . Then, letting  $\kappa = \frac{\max x_i}{\min x_i}$ ,

$$1 \leq \frac{M_q(\mathbf{w}; \mathbf{x})}{M_p(\mathbf{w}; \mathbf{x})} \leq \left( \frac{q-p}{q} \frac{\kappa^q - 1}{\kappa^q - \kappa^p} \right)^{\frac{1}{p}} \left( \frac{p}{q-p} \frac{\kappa^q - \kappa^p}{\kappa^p - 1} \right)^{\frac{1}{q}}.$$

where the power mean  $M_p(\mathbf{w}; \mathbf{x})$  is defined as

$$M_p(\mathbf{w}; \mathbf{x}) := \left( \sum_{i=1}^N w_i x_i^p \right)^{\frac{1}{p}}.$$

**Theorem 9.** Let  $L \in \mathbb{P}^n$  be a positive definite matrix and  $S \subseteq [n]$ . Then,

$$\begin{aligned} \det(L[S])^p &\geq \det(L^p[S]), & 0 \leq p \leq 1, \\ \det(L[S])^p &\leq \det(L^p[S]), & p \geq 1. \end{aligned}$$

*Proof.* From Lemma 1, there exists a vector  $\mathbf{w}$  in the probability simplex, of size  $\binom{n}{|S|}$ , such that

$$\det(L[S]) = \sum_{J \subseteq [n], |J|=|S|} w_J \prod_{i \in J} \lambda_i.$$

Since  $t \rightarrow t^p$  is convex for  $p \geq 1$ , Jensen's inequality shows that

$$\det(L[S])^p \leq \sum_{J \subseteq [n], |J|=|S|} w_J \prod_{i \in J} \lambda_i^p = \det(L^p[S]),$$

where the latter equality follows due to  $L$  and  $L^p$  sharing the same eigenbasis. The same reasoning for  $p < 1$  gives the other side of the inequality.  $\square$

**Theorem 7.** Let  $\mu$  be the distribution induced by a DPP with kernel  $L^p$ , and  $\nu$  be the corresponding E-DPP such that  $\nu(S) \triangleq \det(L[S])^p / Z_p$ . Then  $r(\mu, \nu) \leq r(\kappa_{\lfloor n/2 \rfloor}, p)$  where  $r(\kappa, p)$  is defined by

$$r(\kappa, p) = \begin{cases} \left( \frac{p(\kappa-1)}{\kappa^p-1} \right)^p \left( \frac{(1-p)(\kappa-1)}{\kappa-\kappa^p} \right)^{1-p} & \text{for } 0 < p < 1 \\ \left( \frac{\kappa^p-1}{p(\kappa-1)} \right)^p \left( \frac{(p-1)(\kappa-1)}{\kappa^p-\kappa} \right)^{p-1} & \text{for } p > 1 \end{cases}$$

*Proof.* We show the result for general DPPs; the result for  $k$ -DPPs follows the same exact reasoning. For  $0 < p < 1$ , it follows from Thm. 9 that  $\det(L[S])^p \geq \det(L^p[S])$ . Hence,

$$Z_p = \sum_{S \subseteq [n]} \det(L[S])^p \geq \sum_{S \subseteq [n]} \det(L^p[S]) = \det(I + L^p),$$

which entails  $\frac{\det(I+L^p)}{Z_p} \leq 1$  whereby it remains to bound  $\frac{\det(L[S])^p}{\det(L^p[S])}$ .

Let  $S \subseteq [n]$  of size  $k$ , and let  $\lambda$  be the vector of  $L$ 's eigenvalues. We write  $\lambda^S = \prod_{i \in S} \lambda_i$ , and denote by  $\lambda^{\wedge k}$  the  $\binom{n}{k}$ -vector  $(\lambda^S)_{S \subseteq [n], |S|=k}$ . Using Lemma 1, there exists  $\mathbf{w} \in \mathbb{R}^{\binom{n}{k}}$  that sums to 1 such that

$$\begin{aligned} \frac{\det(L[S])^p}{\det(L^p[S])} &= \frac{(\sum_{|S|=k} w_S \lambda^S)^p}{\sum_{|S|=k} w_S (\lambda^S)^p} = \left( \frac{M_1(\mathbf{w}; \lambda^{\wedge k})}{M_p(\mathbf{w}; \lambda^{\wedge k})} \right)^p \\ &\leq r(p)^p. \end{aligned}$$

Where the last inequality follows from Thm. 8. To lower bound  $r_p(S)$ , the same reasoning gives us  $\frac{\det(L[S]^p)}{\det(L^p[S])} \geq 1$  and hence

$$\begin{aligned} r_p(S) &\geq \frac{\det(I + L^p)}{Z_p} \geq \min_S \frac{\det L^p[S]}{(\det L[S])^p} \\ &\geq \left( \frac{M_p(\mathbf{w}'; \lambda^{\wedge k})}{M_1(\mathbf{w}'; \lambda^{\wedge k})} \right)^p \geq r(p)^{-p}, \end{aligned}$$

where the second inequality follows  $\frac{a+b}{c+d} \geq \min(\frac{a}{c}, \frac{b}{d})$ . The same reasoning yields the result for  $p > 1$ .

Finally, some algebra shows that for fixed  $p$ ,  $r$  is an increasing function of  $\kappa$ , and so  $r(\kappa_k, p)$  is upper bounded by  $r(\kappa_{\lfloor n/2 \rfloor})$ .  $\square$

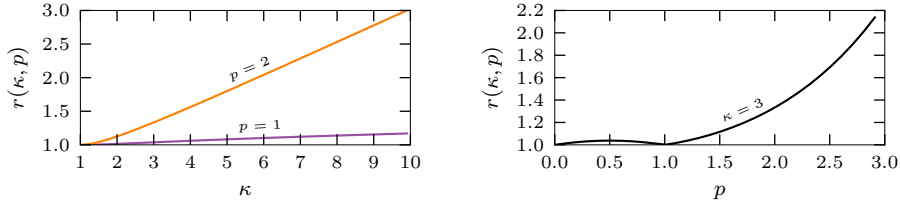

Figure 4: Evolution of the upper bound for  $r(p, \kappa)$  from Thm. 7, which measures the  $r$ -closeness between the E-DPP with kernel  $L$  and the DPP with kernel  $L^p$ .

## E Mixing time as a function of ground set size for E-DPPs

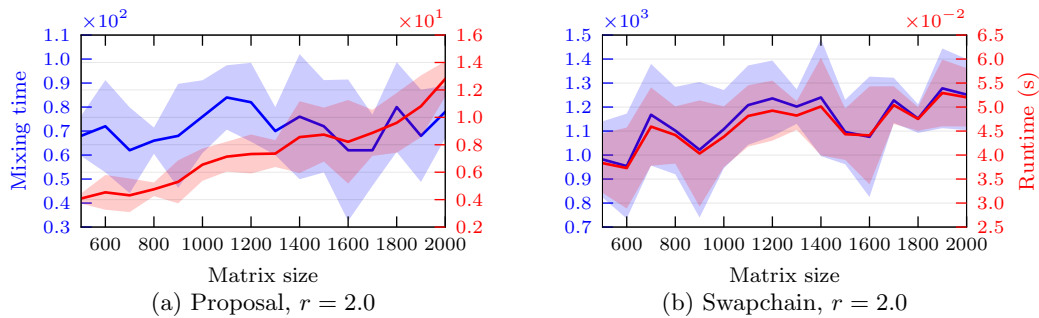

Figure 5: Influence of ground set size  $n$  on mixing time

## F Additional Nystrom sampling results

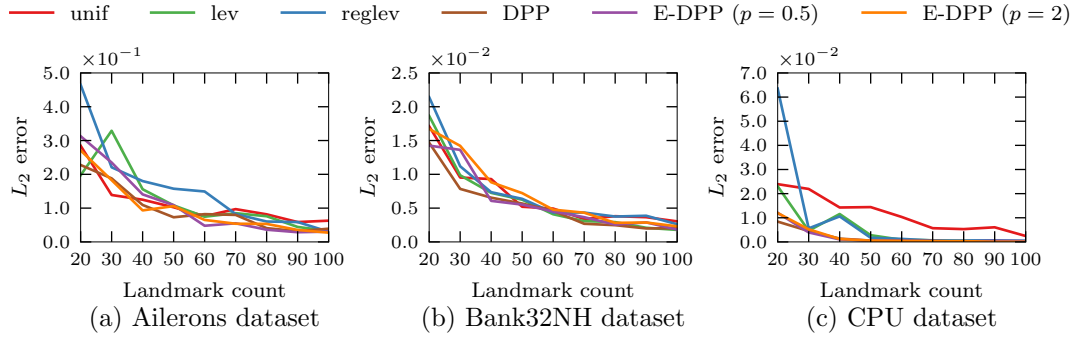

Figure 6:  $L_2$  reconstruction error

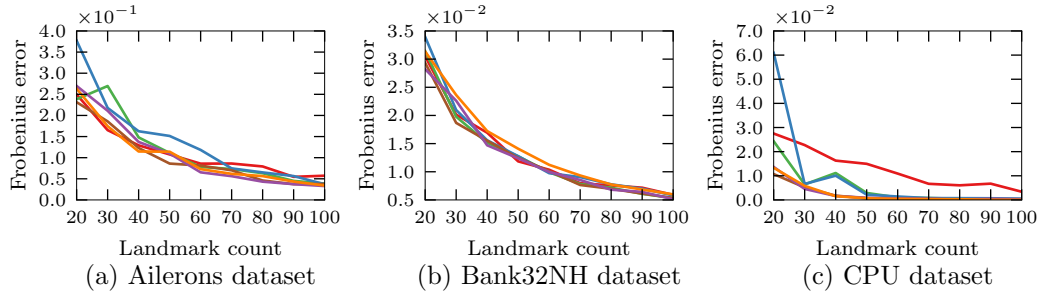

Figure 7: Frobenius norm reconstruction error
